# Supplementary material
Source: publisher figshare collection journal article supplement (https://acs.figshare.com/ndownloader/files/10648714)
Supplement: Supplementary file 1 [file 10648714]

## Supporting Information

# Quantitative analysis of the incorporation behaviors of Sr and Ti atoms during the atomic layer deposition of SrTiO<sub>3</sub> thin films

*Min Jung Chung,<sup>†,§</sup> Woojin Jeon,<sup>†,#,§</sup> Cheol Hyun An,<sup>†</sup> Sang Hyeon Kim,<sup>†</sup> Yoon Kyeong Lee,<sup>†</sup> Woongkyu Lee,<sup>†,‡,\*</sup> and Cheol Seong Hwang<sup>†,\*</sup>*

<sup>†</sup>Department of Materials Science and Engineering and Inter-University Semiconductor Research Center, Seoul National University, Seoul 08826 Republic of Korea

<sup>#</sup>Department of Materials Science and Engineering, Dankook University, Chungnam 31118 Republic of Korea

<sup>‡</sup>Department of Materials Science and Engineering, Northwestern University, Evanston, IL 60208, United States

<sup>§</sup> These two authors equally contributed to this work.

E-mail: woongkyu.lee@northwestern.edu (W.Lee), cheolsh@snu.ac.kr (C.S.Hwang)

### ALD saturation behavior of SrO film using H<sub>2</sub>O as oxygen source

To clarify the difference of oxidation potential on re-oxidization of TiO<sub>2-x</sub> between H<sub>2</sub>O and O<sub>3</sub>, the substrate temperature and oxygen source injection time were fixed to 370 °C and 2 s, respectively. The growth behavior of SrO thin films formed using [Sr(demamp)(tmhd)]<sub>2</sub> and H<sub>2</sub>O evaluated as Figure S1 exhibits typical self-limiting film growth behavior of ALD reaction with the sequence consisted of [Sr(demamp)(tmhd)]<sub>2</sub> injection (5 s), Ar purge (5 s), H<sub>2</sub>O injection (2 s), and Ar purge (5 s).

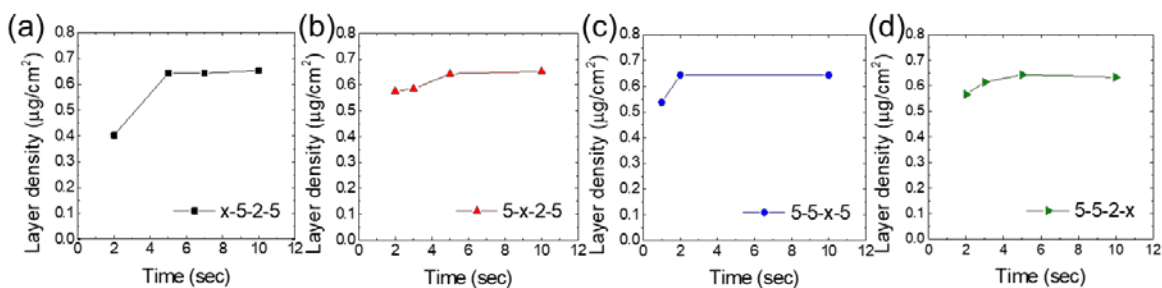

Figure S1. The variations in the layer density of STO thin films deposited for 50 cycles as a function of (a) [Sr(demamp)(tmhd)]<sub>2</sub> injection time, (b) [Sr(demamp)(tmhd)]<sub>2</sub> purge time, (c) H<sub>2</sub>O injection time, and (d) H<sub>2</sub>O purge time.
